# Supplementary material for: Effect of vitamin D supplementation on pain and physical function in patients with knee osteoarthritis (OA): an OA Trial Bank protocol for a systematic review and individual patient data (IPD) meta-analysis
Source: PubMed Central journal article supplement — BMJ Open. 2020 Apr 23;10(4):e035302. doi: 10.1136/bmjopen-2019-035302 (PMC7204938; doi:10.1136/bmjopen-2019-035302), 2020-04-23
Supplement: bmjopen-2019-035302supp001.pdf [file bmjopen-2019-035302supp001.pdf]

## Appendix 1. Search strategy

### Cochrane CENTRAL

- #1. MeSH descriptor Osteoarthritis explode all trees
- #2. (osteoarthriti\* or osteo-arthriti\* or osteoarthrotic or osteoarthros\*):ti,ab,kw
- #3. (degenerative near/2 arthritis):ti,ab,kw
- #4. coxarthrosis:ti,ab,kw
- #5. (#1 OR #2 OR #3 OR #4)
- #6. MeSH descriptor vitamin D explode all trees
- #7. (vitamin D):ti,ab,kw
- #8. (vitamin D2):ti,ab,kw
- #9. (vitamin D3):ti,ab,kw
- #10. (1-alpha hydroxyvitamin D3):ti,ab,kw
- #11. (1-alpha-hydroxy-vitamin D3):ti,ab,kw
- #12. (1-alpha hydroxycalciferol):ti,ab,kw
- #13. (1-alpha-hydroxy-calciferol):ti,ab,kw
- #14. (1,25 dihydroxyvitamin D3):ti,ab,kw
- #15. (1,25-dihydroxy-vitamin D3):ti,ab,kw
- #16. (1,25 dihydroxycholecalciferol):ti,ab,kw
- #17. (1,25-dihydroxycholecalciferol):ti,ab,kw
- #18. (25-hydroxycholecalciferol):ti,ab,kw
- #19. (25 hydroxycholecalciferol):ti,ab,kw
- #20. (25 hydroxyvitamin D):ti,ab,kw
- #21. (25-hydroxy-vitamin D):ti,ab,kw
- #22. (alfacalcidol):ti,ab,kw
- #23. (calcidiol):ti,ab,kw
- #24. (calcitriol):ti,ab,kw
- #25. (calcifediol):ti,ab,kw
- #26. (calciferol):ti,ab,kw
- #27. (ergocalciferol):ti,ab,kw
- #28. (cholecalciferol):ti,ab,kw
- #29. (#6 OR #7 OR #8 OR #9 OR #10 OR #11 OR #12 OR #13 OR #14 OR #15 OR #16 OR #17 OR #18 OR #19 OR #20 OR #21 OR #22 OR #23 OR #24 OR #25 OR #26 OR #27 OR #28)
- #30. #5 AND #29

**MEDLINE (via Ovid)**

1. exp osteoarthritis/
2. (osteoarthriti\* or osteo-arthriti\* or osteoarthrotic or osteoarthros\*).ti,ab.
3. (degenerative adj2 arthritis).ti,ab.
4. coxarthrosis.ti,ab.
5. or/1-4
6. exp Vitamin D/
7. vitamin D.tw.
8. vitamin D2.tw.
9. vitamin D3.tw.
10. 1-alpha hydroxyvitamin D3.tw.
11. 1-alpha-hydroxy-vitamin D3.tw.
12. 1-alpha hydroxycalciferol.tw.
13. 1-alpha-hydroxy-calciferol.tw.
14. 1,25 dihydroxyvitamin D3.tw.
15. 1,25-dihydroxy-vitamin D3.tw.
16. 1,25 dihydroxycholecalciferol.tw.
17. 1,25-dihydroxycholecalciferol.tw.
18. 25-hydroxycholecalciferol.tw.
19. 25 hydroxycholecalciferol.tw.
20. 25 hydroxyvitamin D.tw.
21. 25-hydroxy-vitamin D.tw.
22. alfacalcidol.tw.
23. calcidiol.tw.
24. calcitriol.tw.
25. calcifediol.tw.
26. calciferol.tw.
27. ergocalciferol.tw.
28. cholecalciferol.tw.
29. or/6-28
30. randomized controlled trial.pt.
31. controlled clinical trial.pt.
32. randomized controlled trials.sh.
33. random allocation.sh.
34. double blind method.sh.

35. single-blind method.sh.
36. clinical trial.pt.
37. clinical trials.sh.
38. clinical trial.tw.
39. ((singl\$ or doubl\$ or trebl\$ or tripl\$) and (mask\$ or blind\$)).tw.
40. placebos.sh.
41. placebo\$.tw.
42. random\$.tw.
43. Research Design/
44. comparative study.sh.
45. evaluation studies.sh.
46. follow-up studies.sh.
47. prospective studies.sh.
48. control\$.tw.
49. prospectiv\$.tw.
50. volunteer\$.tw.
51. or/30-50
52. (animal not human).mp.
53. 46 not 47
54. 5 and 29 and 53

**EMBASE (via Ovid)**

1. exp osteoarthritis/
2. (osteoarthriti\* or osteo-arthriti\* or osteoarthrotic or osteoarthros\*).ti,ab.
3. (degenerative adj2 arthritis).ti,ab.
4. coxarthrosis.ti,ab.
5. or/1-4
6. exp Vitamin D/
7. vitamin D.tw.
8. vitamin D2.tw.
9. vitamin D3.tw.
10. 1-alpha hydroxyvitamin D3.tw.
11. 1-alpha-hydroxy-vitamin D3.tw.
12. 1-alpha hydroxycalciferol.tw.
13. 1-alpha-hydroxy-calciferol.tw.
14. 1,25 dihydroxyvitamin D3.tw.
15. 1,25-dihydroxy-vitamin D3.tw.
16. 1,25 dihydroxycholecalciferol.tw.
17. 1,25-dihydroxycholecalciferol.tw.
18. 25-hydroxycholecalciferol.tw.
19. 25 hydroxycholecalciferol.tw.
20. 25 hydroxyvitamin D.tw.
21. 25-hydroxy-vitamin D.tw.
22. alfacalcidol.tw.
23. calcidiol.tw.
24. calcitriol.tw.
25. calcifediol.tw.
26. calciferol.tw.
27. ergocalciferol.tw.
28. cholecalciferol.tw.
29. or/6-28
30. random\$.tw.
31. factorial\$.tw.
32. crossover\$.tw.
33. cross over\$.tw.
34. cross-over\$.tw.

35. placebo\$.tw.
36. (doubl\$ adj blind\$).tw.
37. (singl\$ adj blind\$).tw.
38. assign\$.tw.
39. allocat\$.tw.
40. volunteer\$.tw.
41. Crossover Procedure/
42. double-blind procedure.tw.
43. Randomized Controlled Trial/
44. Single Blind Procedure/
45. or/30-44
46. (animal/ or nonhuman/) not human/
47. 45 not 46
48. 5 and 29 and 47
