# Supplementary material for: Effect of vitamin D supplementation on pain and physical function in patients with knee osteoarthritis (OA): an OA Trial Bank protocol for a systematic review and individual patient data (IPD) meta-analysis
Source: PubMed Central journal article supplement — BMJ Open. 2020 Apr 23;10(4):e035302. doi: 10.1136/bmjopen-2019-035302 (PMC7204938; doi:10.1136/bmjopen-2019-035302), 2020-04-23
Supplement: bmjopen-2019-035302supp002.pdf [file bmjopen-2019-035302supp002.pdf]

**Appendix 2. Modified Cochrane's risk of bias tool.**

| <b>Source of bias<sup>#</sup></b>   | <b>Low risk</b>          | <b>High risk</b>         | <b>Unclear</b>           | <b>Comments</b> |
|-------------------------------------|--------------------------|--------------------------|--------------------------|-----------------|
| 1. Random sequence generation       | <input type="checkbox"/> | <input type="checkbox"/> | <input type="checkbox"/> |                 |
| 2. Allocation concealment           | <input type="checkbox"/> | <input type="checkbox"/> | <input type="checkbox"/> |                 |
| 3. Blinding of participants         | <input type="checkbox"/> | <input type="checkbox"/> | <input type="checkbox"/> |                 |
| 4. Blinding of key study personnel  | <input type="checkbox"/> | <input type="checkbox"/> | <input type="checkbox"/> |                 |
| 5. Blinding of outcome assessment   | <input type="checkbox"/> | <input type="checkbox"/> | <input type="checkbox"/> |                 |
| 6. Incomplete outcome data          | <input type="checkbox"/> | <input type="checkbox"/> | <input type="checkbox"/> |                 |
| 7. Selective outcome reporting      | <input type="checkbox"/> | <input type="checkbox"/> | <input type="checkbox"/> |                 |
| 8. Imbalance in baseline covariates | <input type="checkbox"/> | <input type="checkbox"/> | <input type="checkbox"/> |                 |
| 9. Treatment compliance             | <input type="checkbox"/> | <input type="checkbox"/> | <input type="checkbox"/> |                 |
| 10. Timing of outcome assessment    | <input type="checkbox"/> | <input type="checkbox"/> | <input type="checkbox"/> |                 |
| <b>Overall risk of bias</b>         | <b>Low</b>               | <b>Moderate</b>          | <b>High</b>              |                 |
|                                     | <input type="checkbox"/> | <input type="checkbox"/> | <input type="checkbox"/> |                 |

<sup>#</sup>See *Appendix 2* for criteria for different levels of risk.
